# Supplementary material for: In situ growth of an ultrathin Cu/g-C3N4 coating over SBA-15 for catalytic wet air oxidation of pollutants under extremely mild conditions
Source: Royal Society of Chemistry journal article supplement (doi:10.1039/d4gc00568f), 2024-01-01
Supplement: d4gc00568f1.pdf [file d4gc00568f1.pdf]

## ***In-situ* Growth Preparation of Cu/g-C<sub>3</sub>N<sub>4</sub> Ultrathin Coating over SBA-15 for Catalytic Wet Air Oxidation of Pollutants under Extremely Mild Conditions**

Chao Yuan<sup>#</sup>, Yuan Zhang<sup>#</sup>, Zhiyuan Zong, Shenghui Zhou, Hongyou Cui<sup>\*</sup>, Hongzi Tan<sup>\*</sup>

School of Chemistry and Chemical Engineering, Shandong University of

Technology, Zibo 255000, China

E-mail: cuihy@sdut.edu.cn; hztan@sdut.edu.cn

**Table S1.** Catalytic performance comparison of Cu/CN@SBA with the various catalysts reported in the literature during CWAO of phenol.

| Catalyst                                           | C <sub>phenol</sub> (g/L) | W <sub>catal.</sub> (g/L) | T (°C) | P <sub>O<sub>2</sub></sub> (MPa) | t (h) | X <sub>phenol</sub> (%) | X (%)     | References |
|----------------------------------------------------|---------------------------|---------------------------|--------|----------------------------------|-------|-------------------------|-----------|------------|
| Cu <sub>0.1</sub> -g-C <sub>3</sub> N <sub>4</sub> | 2.1                       | 1                         | 120    | 1                                | 1     | 89.6                    | 70.4(COD) | [1]        |
| Pt-Pb/XC-72R                                       | 1                         | 4                         | 100    | 2                                | 1     | 100                     | 91.1(TOC) | [2]        |
| Pt/TiO <sub>2</sub>                                | 1                         | 4                         | 100    | 2                                | 1     | 100                     | 88.8(TOC) | [3]        |
| N-LCO (M)                                          | 8                         | 1                         | 140    | 1                                | 1     | 100                     | 87.9(COD) | [4]        |
| Cu-Ce/AC                                           | 1                         | 1                         | 160    | 3                                | 1.5   | 100                     | 95.9(COD) | [5]        |
| Cu/AC                                              | 1                         | 2                         | 160    | 3                                | 0.5   | 95                      | 94.0(COD) | [6]        |
| LaAlO <sub>3</sub>                                 | 0.5                       | 1                         | 200    | 2                                | 1     | 100                     | 90.0(TOC) | [7]        |
| Cu <sub>3</sub> -Al-500                            | 2.1                       | 1                         | 120    | 1                                | 2     | 100                     | -         | [8]        |
| LMHS                                               | 1                         | 4                         | 140    | 0.4                              | 3     | 97                      | 70.5(TOC) | [9]        |
| MWCNTs                                             | 2                         | 0.4                       | 160    | 2.5                              | 2     | 73                      | -         | [10]       |
| TiO <sub>2</sub> -CeO <sub>2</sub>                 | 2.1                       | 4                         | 160    | 2                                | 3     | 100                     | 88.0(TOC) | [11]       |
| Pt/Ru                                              | 2.1                       | 4                         | 160    | 2                                | 3     | 100                     | 90.0(TOC) | [12]       |
| GO                                                 | 1                         | 0.2                       | 155    | 2.5                              | 2     | -                       | 84.5(TOC) | [13]       |
| CeO <sub>2</sub> /γ-Al <sub>2</sub> O <sub>3</sub> | 1                         | 3                         | 160    | 1.5                              | 4     | 96                      | 85.3(COD) | [14]       |
| Cu <sub>1</sub> /CN <sub>3.3</sub> @SBA-N          | 2.1                       | 10                        | 90     | 0.8                              | 4     | 100                     | 89.1(COD) | This work  |
| Cu <sub>1</sub> /CN <sub>3.3</sub> @SBA-N          | 2.1                       | 10                        | 100    | 0.8                              | 2     | 100                     | 93.9(COD) | This work  |
| Cu <sub>1</sub> /CN <sub>3.3</sub> @SBA-N          | 2.1                       | 10                        | 120    | 0.8                              | 1     | 100                     | 94.3(COD) | This work  |

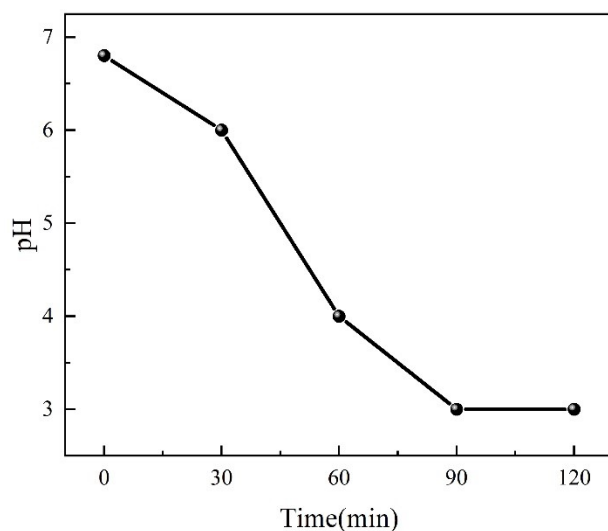

**Fig. S1** The change tendency of pH value during phenol oxidation over  $\text{Cu}_1/\text{CN}_{3.3}/\text{SBA}$  catalyst. Reaction conditions: 50 mL phenol solution (2.1 g/L), 0.5 g catalyst, 100 °C and 0.8 MPa initial  $\text{O}_2$  pressure.

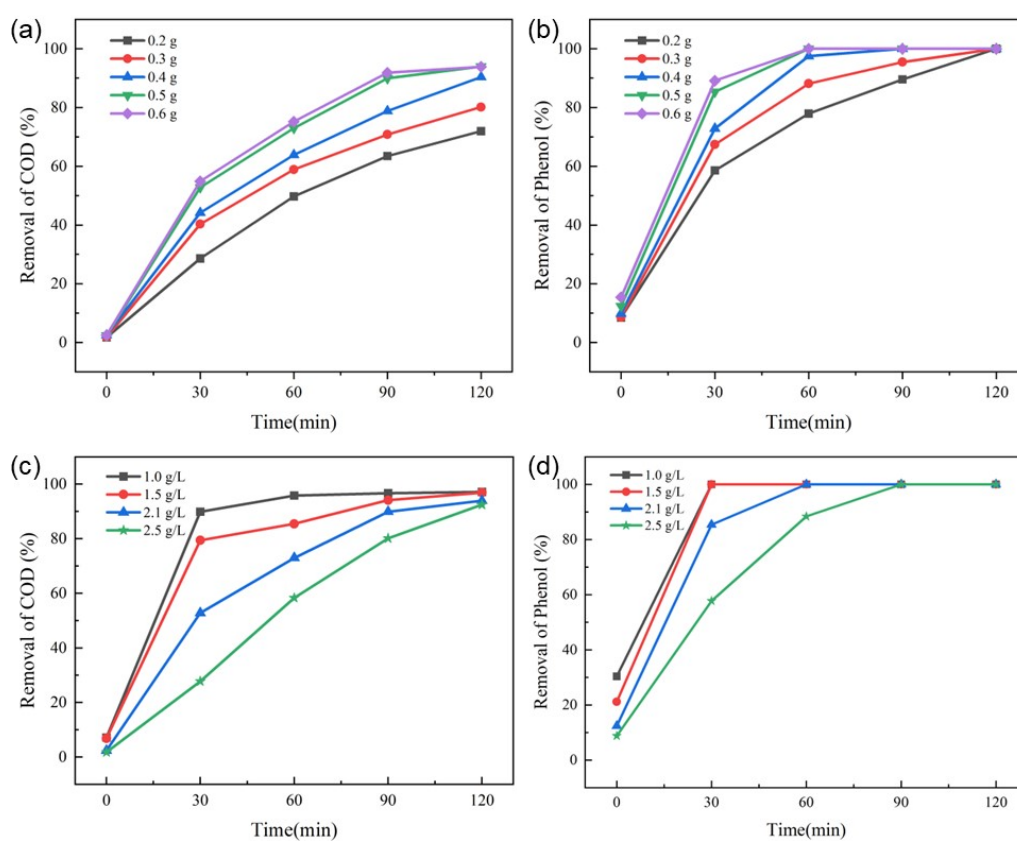

**Fig. S2** Catalytic performance of  $\text{Cu}_1/\text{CN}_{3.3}/\text{SBA}$  catalyst under 100 °C and 0.8 MPa initial  $\text{O}_2$  pressure with (a, b) different catalyst dosages and (c, d) different phenol concentration.

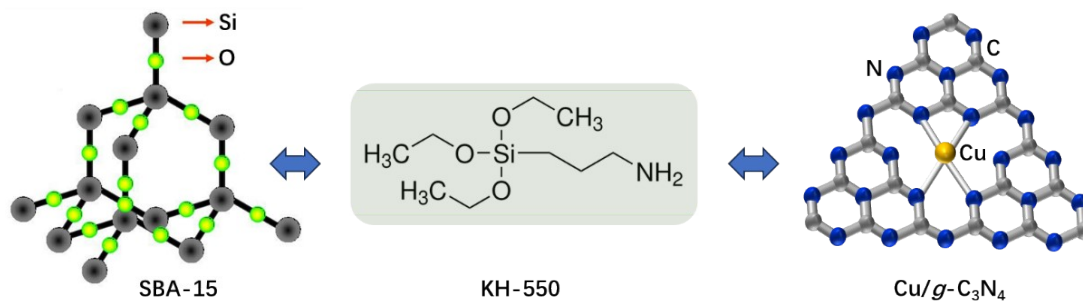

**Fig. S3** Schematic diagram of KH-550 linking with SBA-15 and Cu/g-C<sub>3</sub>N<sub>4</sub>.

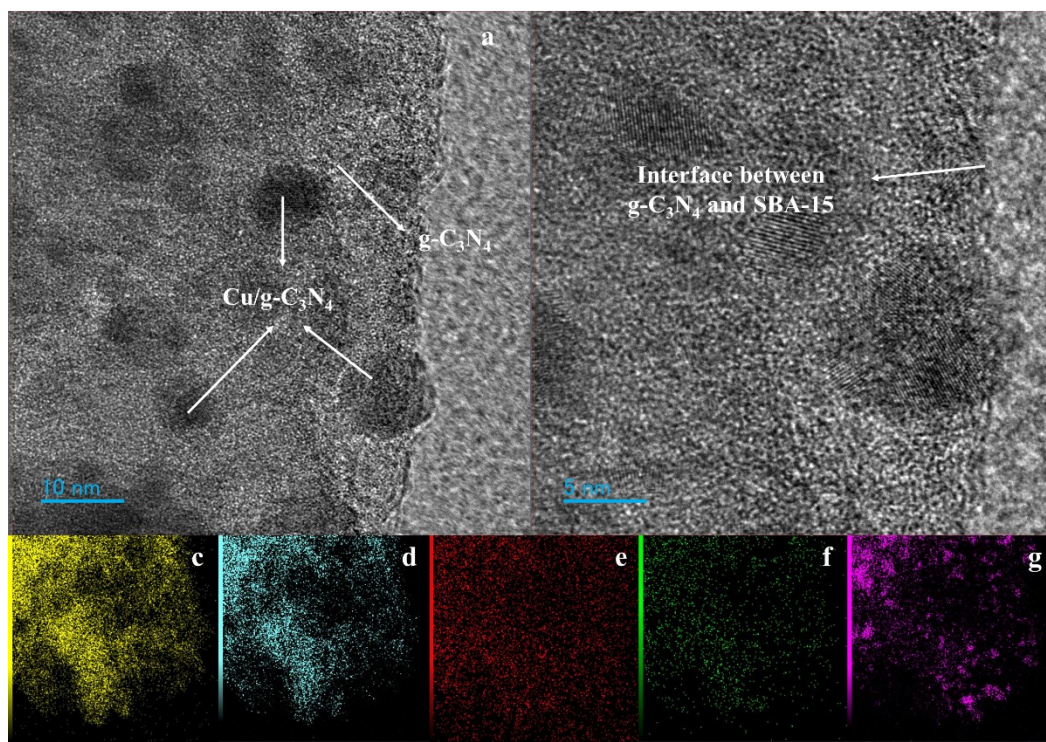

**Fig. S4** HRTEM images (a, b) and EDX elemental mapping (c: Si, d: O, e: C, f: N, e: Cu) of Cu<sub>1</sub>/CN<sub>3.3</sub>@SBA.

The FTIR spectra of Cu<sub>1</sub>/CN<sub>1.7</sub>@SBA, Cu<sub>1</sub>/CN<sub>3.3</sub>@SBA, Cu<sub>1</sub>/CN<sub>5</sub>@SBA and Cu<sub>1</sub>/CN<sub>3.3</sub>@SBA-N are shown in **Fig. S5**. All catalysts showed characteristic peaks at 1086, 801, and 403 cm<sup>-1</sup>, attributed to Si-O-Si, O-Si-O, and O-Si, respectively, almost exactly consistent with the infrared spectra of SBA-15 [15]. This phenomenon indicates that the Cu/CN thin layer is very evenly dispersed on SBA-15.

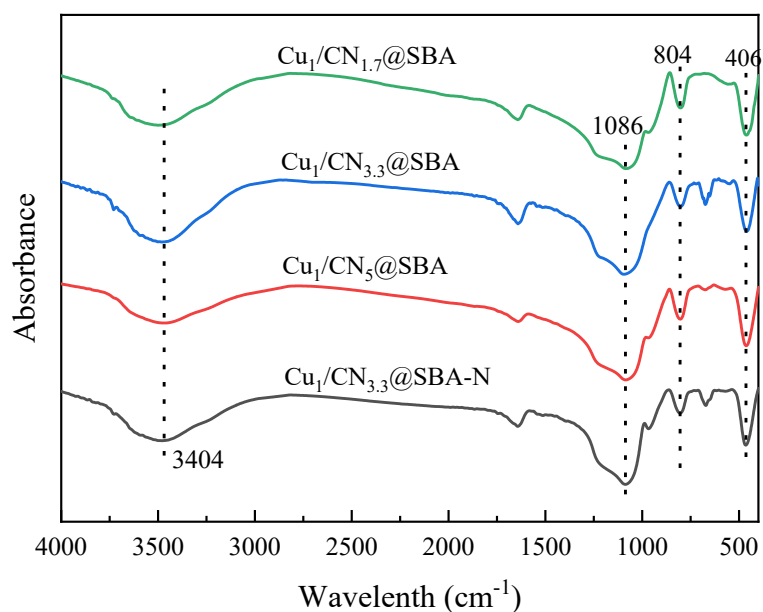

**Fig. S5** FTIR spectra of  $\text{Cu}_1/\text{CN}_{1.7}@SBA$ ,  $\text{Cu}_1/\text{CN}_{3.3}@SBA$ ,  $\text{Cu}_1/\text{CN}_5@SBA$  and  $\text{Cu}_1/\text{CN}_{3.3}@SBA-N$ .

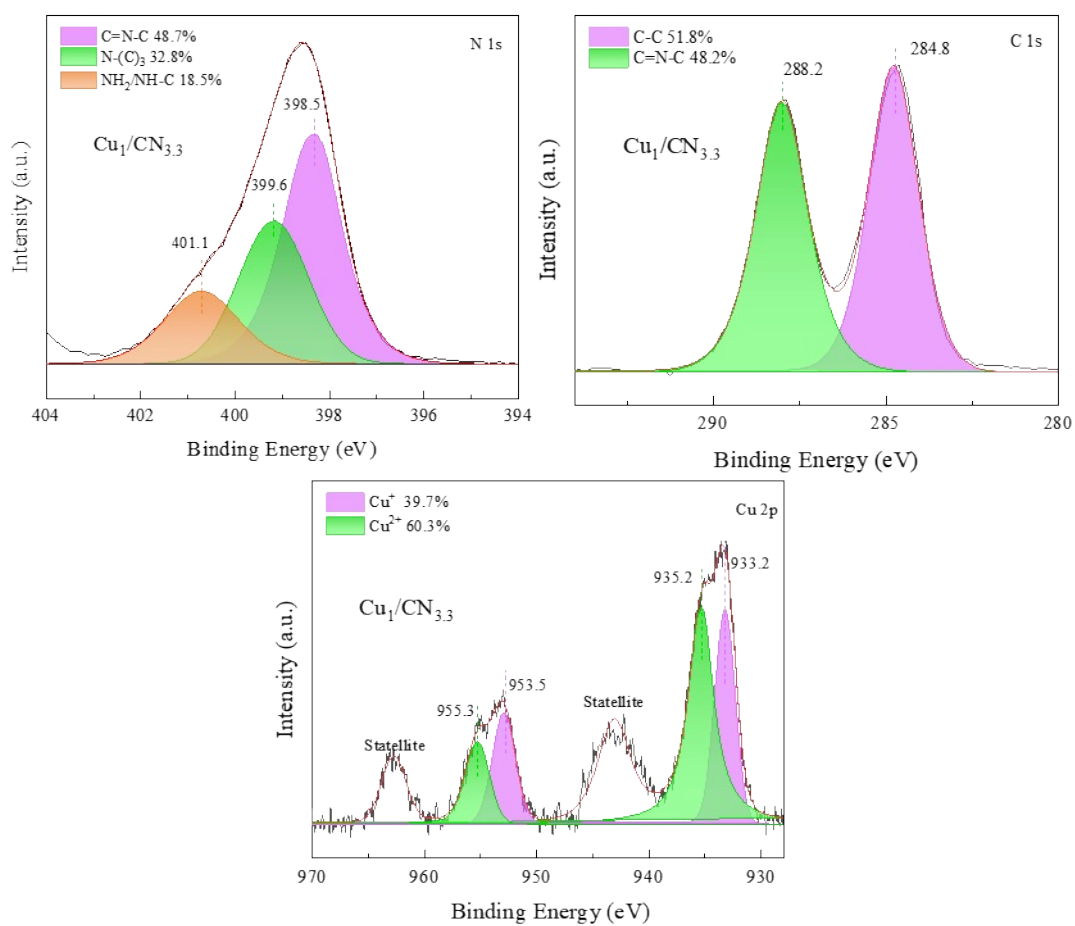

**Fig. S6** XPS spectra of  $\text{Cu}_1/\text{CN}_3$ .

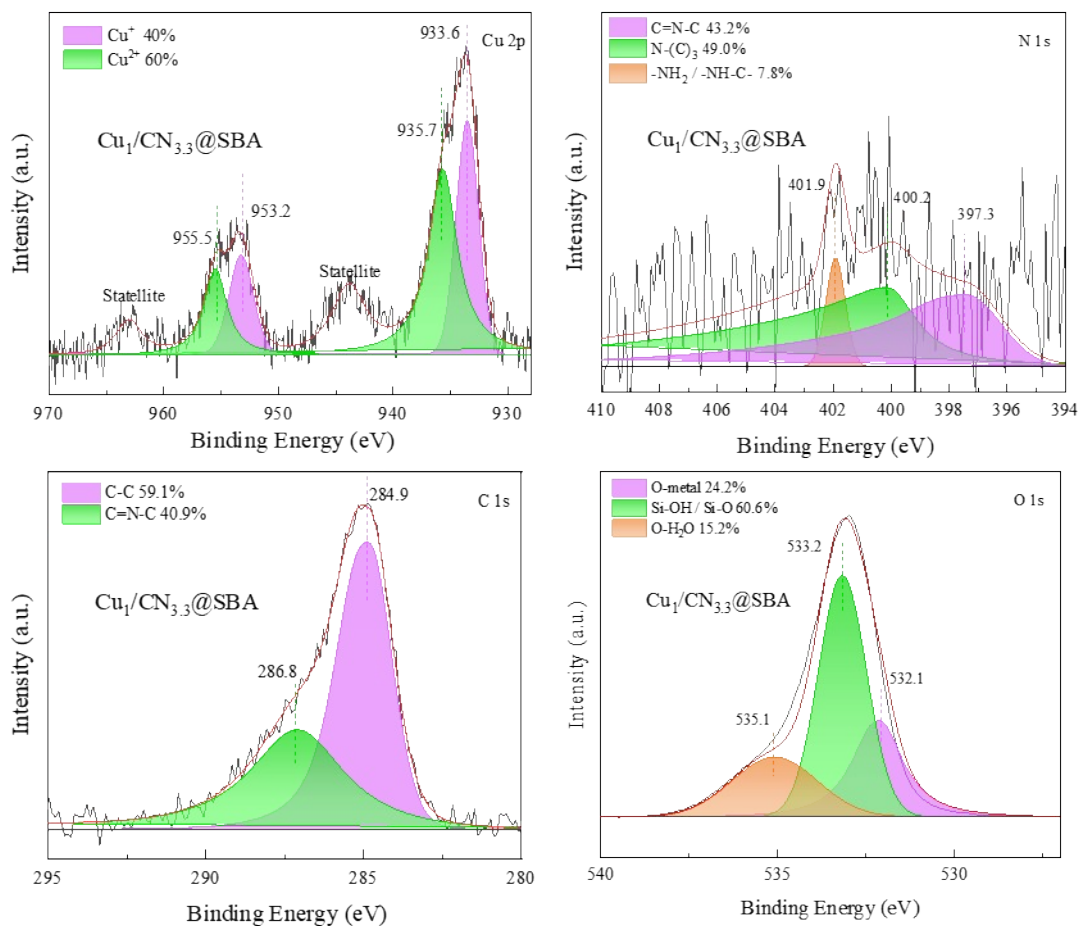

**Fig. S7** XPS spectra of  $\text{Cu}_1/\text{CN}_{3.3}@SBA$ .

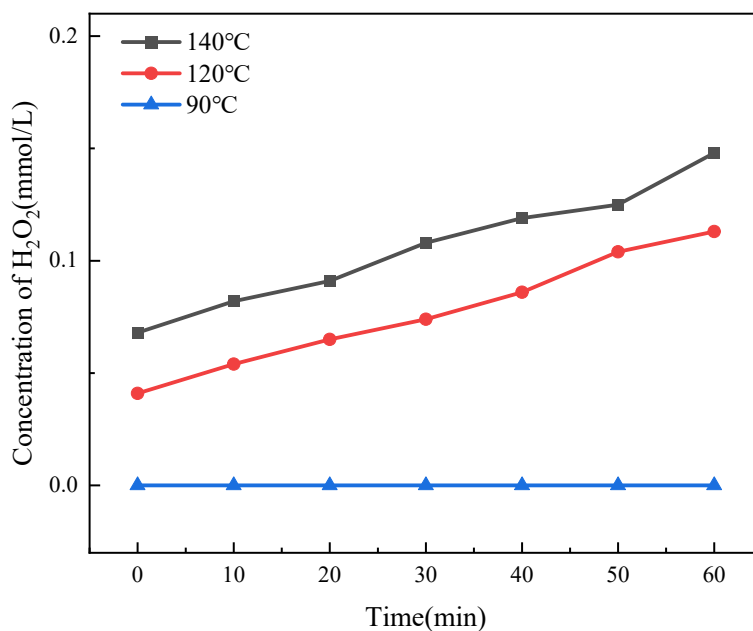

**Fig. S8** Generated  $\text{H}_2\text{O}_2$  concentration versus reaction time.

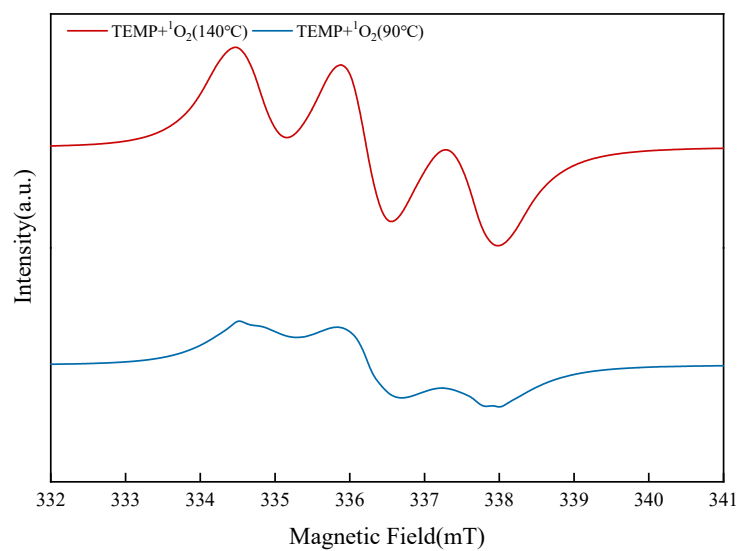

**Fig. S9** EPR spectra obtained for catalytic oxidation in the presence of  $\text{Cu}_1/\text{CN}_{3.3}/\text{SBA-N}$  under different temperatures.

## Reference

- [1] W. Zhang, B. Ye, Z. Zhong, Y. Jiang, R. Zhou, Z. Liu, Z. Hou, Catalytic wet air oxidation of toxic containments over highly dispersed Cu(II)/Cu(I)-N species in the framework of g-C<sub>3</sub>N<sub>4</sub>, *J Hazard Mater*, **424** (2022) 127679.
- [2] H. Shan, R. Oh, J. Fan, X. Zhang, N. Zhang, X. Huang, G.-S. Park, Q. Zheng, H. Lu, B. Chen, Developing Pt-M/C catalyst (M=Pb, Cu) for efficient catalytic wet air oxidation of phenol wastewater under mild conditions, *Journal of Environmental Chemical Engineering*, **11** (2023) 109854.
- [3] J. Fu, X. Zhang, H. Li, B. Chen, S. Ye, N. Zhang, Z. Yu, J. Zheng, B. Chen, Enhancing electronic metal support interaction (EMSI) over Pt/TiO<sub>2</sub> for efficient catalytic wet air oxidation of phenol in wastewater, *Journal of Hazardous Materials*, **426** (2022) 128088.
- [4] Z. Ding, C. Liu, B. Yang, C. Ding, S. Mao, M. Shi, X. Hong, F. Wang, M. Xia, The efficient degradation of high concentration phenol by Nitrogen-doped perovskite La<sub>2</sub>CuO<sub>4</sub> via catalytic wet air oxidation: Experimental study and DFT calculation, *Separation and Purification Technology*, **322** (2023) 124310.
- [5] G. Li, S. Chai, G. Zhang, J. Liu, Y. Zhang, Y. Lv, Y. Wang, Y. Zhao, Deactivation characteristics of Ce-modified Cu-based carbon materials for catalytic wet air oxidation of phenol wastewater, *Journal of Environmental Chemical Engineering*, **10** (2022) 108228.
- [6] H. Wang, G. Li, S. Zhang, Y. Li, Y. Zhao, L. Duan, Y. Zhang, Preparation of Cu-Loaded Biomass-Derived Activated Carbon Catalysts for Catalytic Wet Air Oxidation of Phenol, *Industrial & Engineering Chemistry Research*, **59** (2020) 2908-2920.
- [7] M. Moothedan, K.B. Sherly, Synthesis and characterization of nanomesoporous lanthanum aluminate (LaAlO<sub>3</sub>) for catalytic wet air oxidation of phenol, *Emergent Materials*, **3** (2020) 267-277.
- [8] C. Lai, T. He, X. Li, F. Chen, L. Yue, Z. Hou, Catalytic wet air oxidation of phenols over porous plate Cu-based catalysts, *Applied Clay Science*, **181** (2019)

105253.

- [9] S. Lefevre, O. Boutin, J.H. Ferrasse, L. Malleret, R. Faucherand, A. Viand, Thermodynamic and kinetic study of phenol degradation by a non-catalytic wet air oxidation process, *Chemosphere*, **84** (2011) 1208-1215.
- [10] J. Wang, W. Fu, X. He, S. Yang, W. Zhu, Catalytic wet air oxidation of phenol with functionalized carbon materials as catalysts: reaction mechanism and pathway, *J Environ Sci (China)*, **26** (2014) 1741-1749.
- [11] A.E.d.l. Monteros, G. Lafaye, A. Cervantes, G. Del Angel, J. Barbier Jr, G. Torres, Catalytic wet air oxidation of phenol over metal catalyst (Ru,Pt) supported on TiO<sub>2</sub>-CeO<sub>2</sub> oxides, *Catalysis Today*, **258** (2015) 564-569.
- [12] S. Keav, A.E. de los Monteros, J. Barbier, D. Duprez, Wet Air Oxidation of phenol over Pt and Ru catalysts supported on cerium-based oxides: Resistance to fouling and kinetic modelling, *Applied Catalysis B: Environmental*, **150-151** (2014) 402-410.
- [13] S. Yang, Y. Cui, Y. Sun, H. Yang, Graphene oxide as an effective catalyst for wet air oxidation of phenol, *J Hazard Mater*, **280** (2014) 55-62.
- [14] I.P. Chen, S.-S. Lin, C.-H. Wang, S.-H. Chang, CWAO of phenol using CeO<sub>2</sub>/ $\gamma$ -Al<sub>2</sub>O<sub>3</sub> with promoter—Effectiveness of promoter addition and catalyst regeneration, *Chemosphere*, **66** (2007) 172-178.
- [15] X. Xu, J. He, Y. Zeng, C. Yu, F. Zhang, Controllable surface-initiated metal-free atom transfer radical polymerization of methyl methacrylate on mesoporous SBA-15 via reductive quenching, *European Polymer Journal*, **131** (2020) 109724.
